# Supplementary material for: The Molecular Mechanisms Underlying the Proinflammatory Actions of Thiazolidinediones in Human Macrophages
Source: Oxford University Press journal article supplement (doi:10.1210/me.2007-0060), 2007-05-08

**Supplemental Fig. 1.** PPAR $\delta$  displays Pro-Inflammatory Activity in Human Monocytes

**A**, MIP-1 and Eotaxin RNA levels in THP-1 cells were measured by real-time PCR. THP-1 cells were treated with vehicle (Veh), TNF $\alpha$  (50 ng/ml), 10<sup>-5</sup> M PPAR $\delta$  agonist carbaprostacyclin (Carb) or Carb+TNF $\alpha$  for 24 h. Total RNA was harvested, and cDNA was prepared and used as a template for gene expression analysis. All values were normalized to a 36B4 control.

Graphical data is represented as fold induction over vehicle (set at 1). Data points represent the average of triplicate amplification reactions for each condition in a representative experiment. Very similar results were observed in THP-1s that were differentiated into macrophages. **B**, IL-6 receptor RNA expression in THP-1 cells was analyzed by real-time PCR as described in **A**.

**Supplemental Fig. 2.** Cell Lacking PPAR $\delta$  Are Resistant to Anti-Inflammatory Action of PPAR $\delta$  Antagonist GSK660

IL-1 $\beta$  and IL-6 RNA levels in HeLa cells (which lack detectable PPAR $\delta$  activity) were measured by real-time PCR. HeLa cells were treated with vehicle (Veh), TNF $\alpha$  (50 ng/ml), 10<sup>-6</sup> M PPAR $\delta$  antagonist GSK660 or TNF $\alpha$ +GSK660 for 24 h. Total RNA was harvested, and cDNA was prepared and used as a template for gene expression analysis. All values were normalized to a 36B4 control. Graphical data is represented as fold induction over vehicle (set at 1). Data points represent the average of triplicate amplification reactions for each condition in a representative experiment.

**Supplemental Fig. 3.** PPAR $\delta$  Lacks Pro-Inflammatory Activity in Mouse Monocytes and Macrophages

RAW cells contain functional PPAR $\delta$  and PPAR $\gamma$  (26). MCP-1 RNA levels in RAW cells were measured by real-time PCR. Cells were treated with vehicle (Veh), TNF $\alpha$  (50 ng/ml), 10<sup>-5</sup> M PPAR $\delta$  agonist carbaprostacyclin (Carb), TNF $\alpha$ +Carb, LPS (20 ng/ml) or LPS+Carb for 24 h. Total RNA was harvested, and cDNA was prepared and used as a template for gene expression analysis. All values were normalized to a cyclophilin control. Graphical data is represented as fold induction over vehicle (set at 1). Data points represent the average of triplicate amplification reactions for each condition in a representative experiment. Very similar results were observed in RAW cells that were differentiated into macrophages. Note that TNF $\alpha$  does not elicit an inflammatory response in mouse monocytes. However, the pro-inflammatory activity of LPS is not potentiated by Carb administration as it is in human monocytes. Furthermore, Carb alone is marginally anti-inflammatory in these cells.

# Supplemental Figure 1

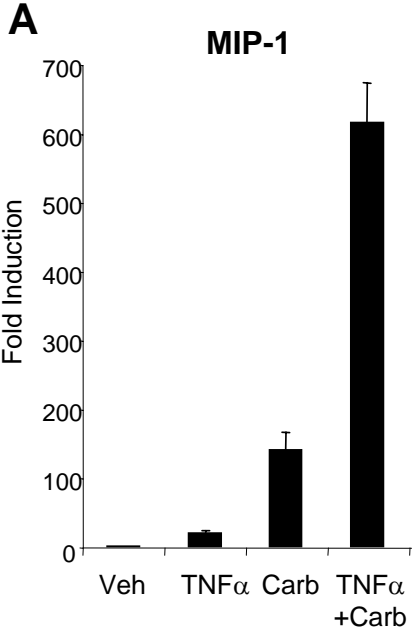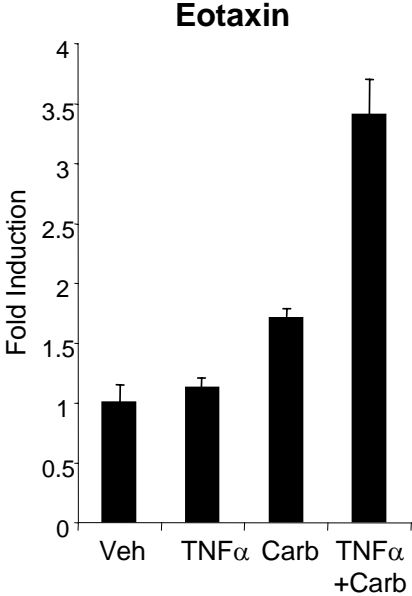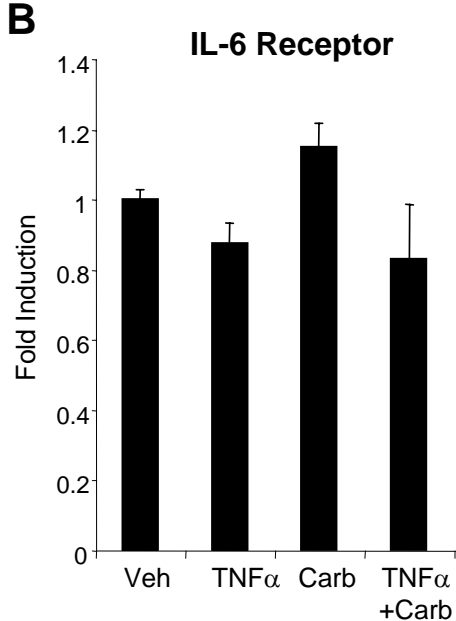

# Supplemental Figure 2

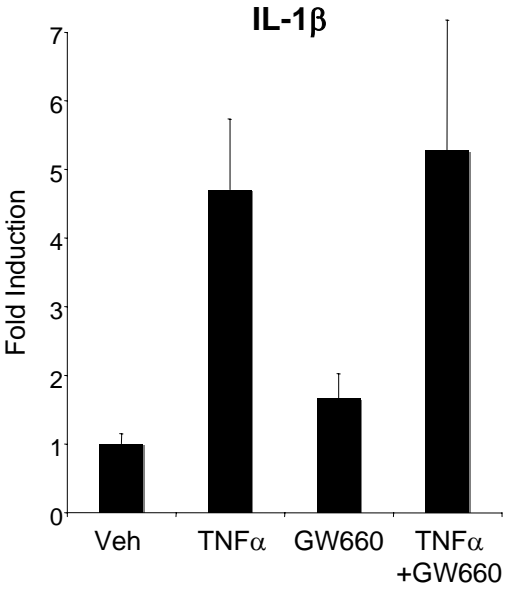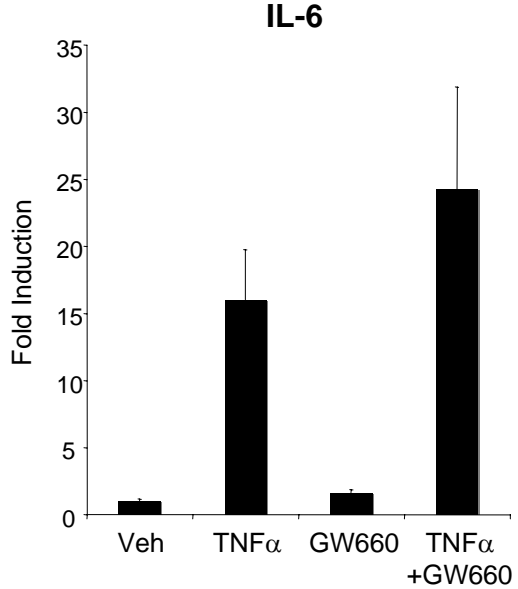

# Supplemental Figure 3

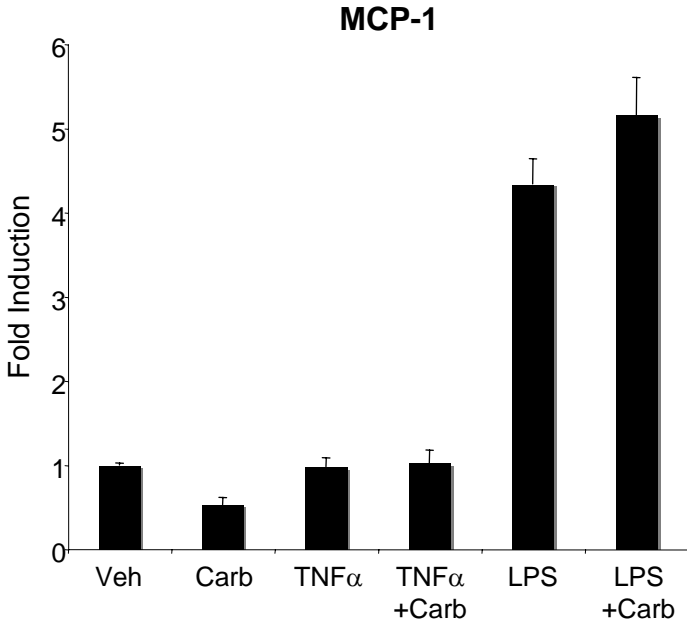

Supplement: 1.suppl_figures_and_legends.pdf [file 1.suppl_figures_and_legends.pdf]
